# Supplementary material for: Improved stability of organic electrochemical transistor performance with a low swelling mixed conducting polymer: a comparative study with PEDOT:PSS
Source: Royal Society of Chemistry journal article supplement (doi:10.1039/d3tc00108c), 2023-01-01
Supplement: d3tc00108c1.pdf [file d3tc00108c1.pdf]

## Supporting Information for

### Stable electrochemical transistor performance with a low-swelling mixed conducting polymer

Natalia Pereira Menezes<sup>a</sup>, Tommaso Nicolini<sup>b</sup>, Micah Barker<sup>b</sup>, André Augusto Mariano<sup>c</sup>, César Augusto Dartora<sup>a</sup>, Guillaume Wantz<sup>d</sup>, Natalie Stingelin<sup>e</sup>, Mamatimin Abbas<sup>d</sup>, Olivier J. Dautelf, Damien Thuau<sup>d\*</sup>

<sup>a</sup>PIPE, Universidade Federal do Paraná, Cel. Francisco H. dos Santos Avenue, 100 - Jardim das Américas, Curitiba, 81530-000, Paraná, Brazil

<sup>b</sup>Université de Bordeaux, CNRS Bordeaux INP/ENSCBP, Laboratoire de Chimie des Polymères Organiques, UMR 5629, Allée Geoffroy Saint-Hilaire, Pessac 33615, France

<sup>c</sup>PPGEE, Universidade Federal do Paraná, Cel. Francisco H. dos Santos Avenue, 100 - Jardim das Américas, Curitiba, 81530-000, Paraná, Brazil

<sup>d</sup>CNRS Bordeaux INP/ENSCBP Laboratoire de l'Intégration du Matériau au Système UMR 5218, Université de Bordeaux, 16 Avenue Pey Berland, Pessac Cedex, 33607, France

<sup>e</sup>School of Materials Science & Engineering and School of Chemical & Biomolecular Engineering Georgia Institute of Technology 901 Atlantic Dr, Atlanta, GA 30318, USA

<sup>f</sup>Institut Charles Gerhardt Montpellier, UMR 5253 Univ. Montpellier-CNRS-ENSCM. Campus CNRS-Bâtiment Balard, 1919, route de Mende, 34293 Montpellier Cedex 05, France

\*e-mail: [damien.thuau@ims-bordeaux.fr](mailto:damien.thuau@ims-bordeaux.fr)

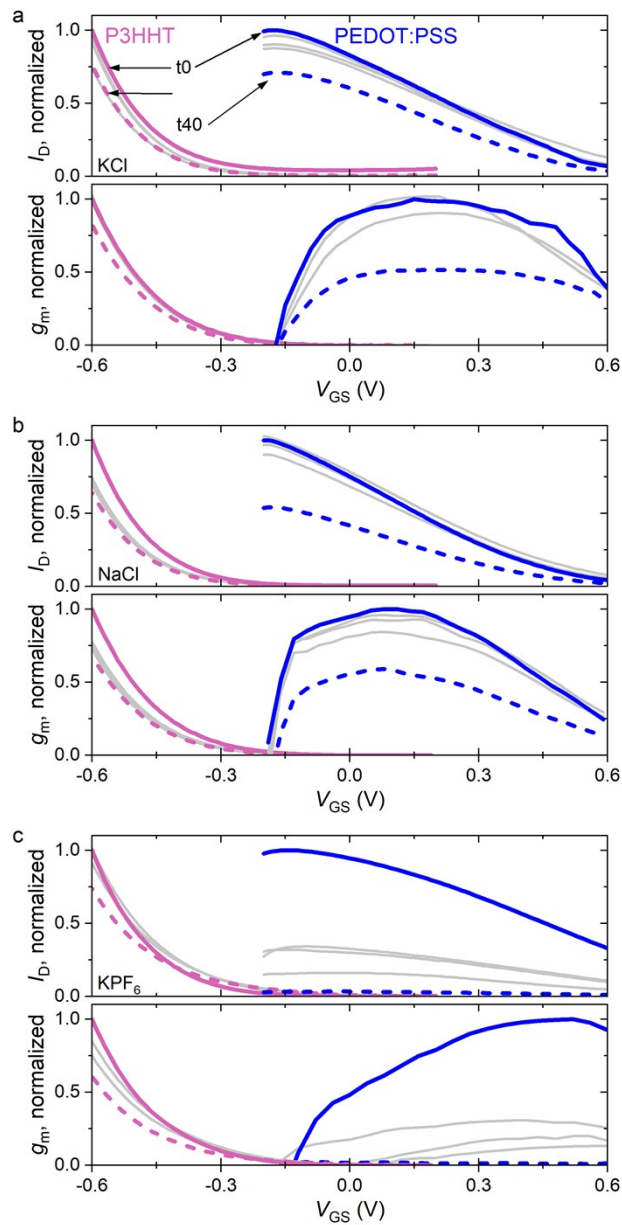

**Figure S1.** Normalized drain current ( $I_{DS}$ ) and transconductance ( $g_m$ ) traces measured for OECTs with P3HHT or PEDOT:PSS as the active channel material during 40 days of continuous immersion in 0.1 M aqueous solutions of **a)** KCl, **b)** NaCl, and **c)**  $KPF_6$  electrolytes. Traces correspond to initial measurements ( $t_0$ , bold solid lines) and measurements done after 10, 20, 30 (solid grey lines), and 40 days ( $t_{40}$ , dashed lines) of continuous device immersion. Data are normalized to the maximum value of initial measurements. Devices are operated at a drain voltage ( $|V_{DS}|$ ) of 0.6 V.

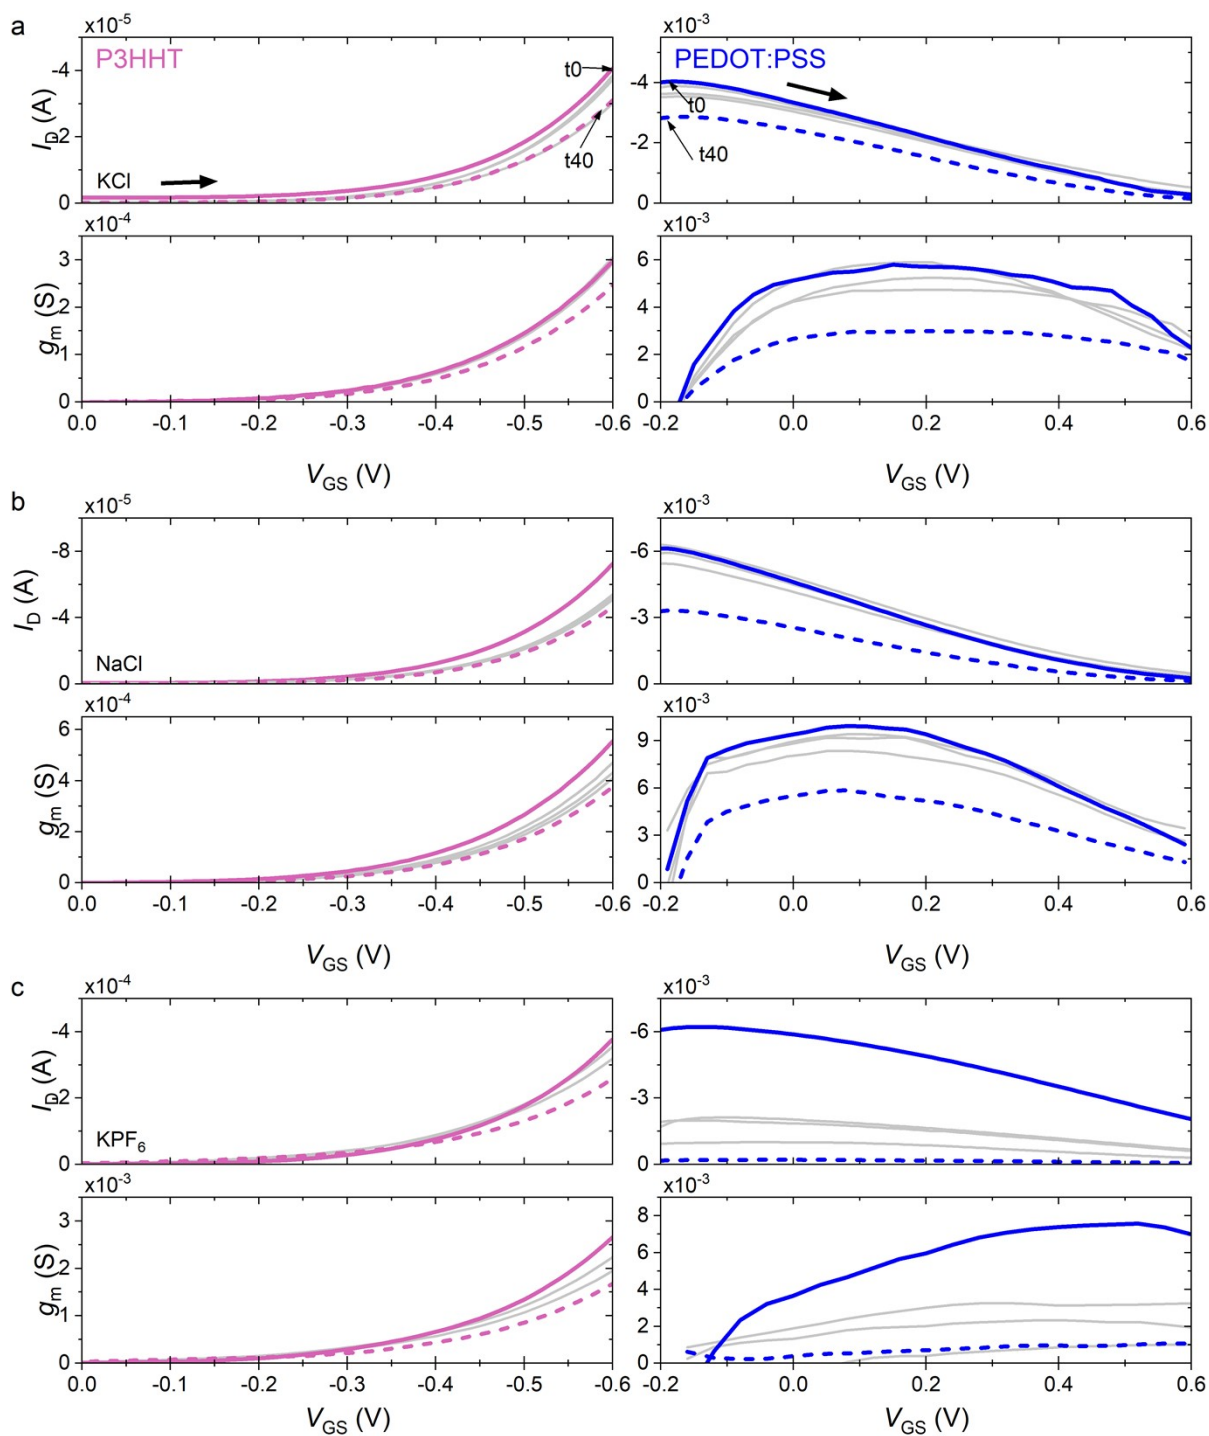

**Figure S2.** Drain current ( $I_D$ ) and transconductance ( $g_m$ ) measured for OECTs with P3HHT or PEDOT:PSS as the active channel material during 40 days of continuous immersion in 0.1 M aqueous solutions of **a)** KCl, **b)** NaCl, and **c)** KPF<sub>6</sub> electrolytes. Traces correspond to initial measurements ( $t_0$ , bold solid lines) and measurements done after 10, 20, 30 (solid grey lines), and 40 days ( $t_{40}$ , dashed lines) of continuous device immersion. Bold arrows show direction of gate potential ( $V_{GS}$ ) sweep. Devices are operated at a drain voltage ( $|V_{DS}|$ ) of 0.6 V.
